# Supplementary material
Source: PubMed Central journal article supplement (PMC3444295)
Supplement: NIHMS339144-supplement-01.pdf [file NIHMS339144-supplement-01.pdf]

# Suppl. figure

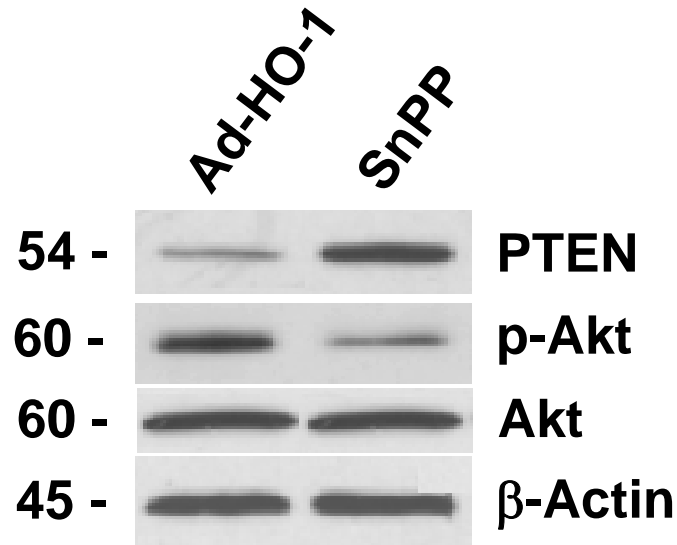

We used SnPP, a competitive HO-1 inhibitor, to determine whether HO-1 inhibitor affects the expression of PTEN or Akt in our experimental model. Indeed, at 6 h of reperfusion after 90 min of liver warm ischemia, pretreatment with SnPP (30  $\mu$ M/Kg i.p. at day -1) increased expression of PTEN, while simultaneously decreasing the expression of p-Akt in the ischemic liver lobes by Western blot assay.
